# Supplementary material for: Emerging oxidized and defective phases in low-dimensional CrCl3
Source: Royal Society of Chemistry journal article supplement (doi:10.1039/d1na00401h), 2021-01-01
Supplement: d1na00401h1.pdf [file d1na00401h1.pdf]

## Supplementary Information

### Emerging oxidized and defective phases in low-dimensional CrCl<sub>3</sub>

Dario Mastrippolito,<sup>1,\*</sup> Luca Ottaviano,<sup>1,2</sup> Jing Wang,<sup>3</sup> Jinjin Yang,<sup>3</sup> Faming Gao,<sup>3</sup> Mushtaq Ali,<sup>1</sup> Gianluca D'Olimpio,<sup>1</sup> Antonio Politano,<sup>1,4</sup> Stefano Palleschi,<sup>1</sup> Shafaq Kazim,<sup>5</sup> Roberto Gunnella,<sup>5</sup> Andrea Di Cicco,<sup>5</sup> Anna Sgarlata,<sup>6</sup> Judyta Strychalska-Nowak,<sup>7</sup> Tomasz Klimczuk,<sup>7</sup> Robert Joseph Cava,<sup>8</sup> Luca Lozzi,<sup>1</sup> and Gianni Profeta<sup>1,2</sup>

<sup>1</sup>*Department of Physical and Chemical Sciences,  
University of L'Aquila, Via Vetoio 10, 67100 L'Aquila, Italy*

<sup>2</sup>*CNR-SPIN L'Aquila, Via Vetoio 10, 67100 L'Aquila, Italy*

<sup>3</sup>*Key Laboratory of Applied Chemistry, Yanshan University, Qinhuangdao, 066004, P.R. China*

<sup>4</sup>*CNR-IMM Institute for Microelectronics and Microsystems, VIII strada 5, 95121 Catania, Italy*

<sup>5</sup>*School of Science and Technology Physics division, University of Camerino, Italy*

<sup>6</sup>*Department of Physics, Tor Vergata University of Rome,  
Via Della Ricerca Scientifica 1, 00133 Roma, Italy*

<sup>7</sup>*Faculty of Applied Physics and Mathematics Gdansk University of Technology, Gdansk, Poland*

<sup>8</sup>*Department of Chemistry Princeton University, Princeton, NJ 08544, United States of America*

---

\* email: [dario.mastrippolito@graduate.univaq.it](mailto:dario.mastrippolito@graduate.univaq.it)

## I. CORE LEVEL PHOTOEMISSION

The core level spectra reported in the main article have been quantitatively analyzed to determine the relative Cl/Cr atomic ratio and the elemental surface concentration by considering the values of 0.770 and 0.711 of the atomic sensitivity factors as reported in Ref. [1]. The Cr atomic sensitivity factor has been recalculated by assuming the presence of Cr in two phases, namely  $\text{CrCl}_3$  and  $\text{Cr}_2\text{O}_3$ . Under this assumption, the Cr  $2p_{3/2}$  atomic sensitivity factor ( $ASF_{Cr}$ ) can be estimated from the experimentally measured spectral area ( $A_{Cr}$ ) of the Cr  $2p$  core level with the following:

$$ASF_{Cr} = \frac{3A_{Cr}}{2A_O/0.711 + A_{Cl}/0.770},$$

where  $A_O$  and  $A_{Cl}$  are the experimental areas of O  $1s$  and Cl  $2p$ , respectively.

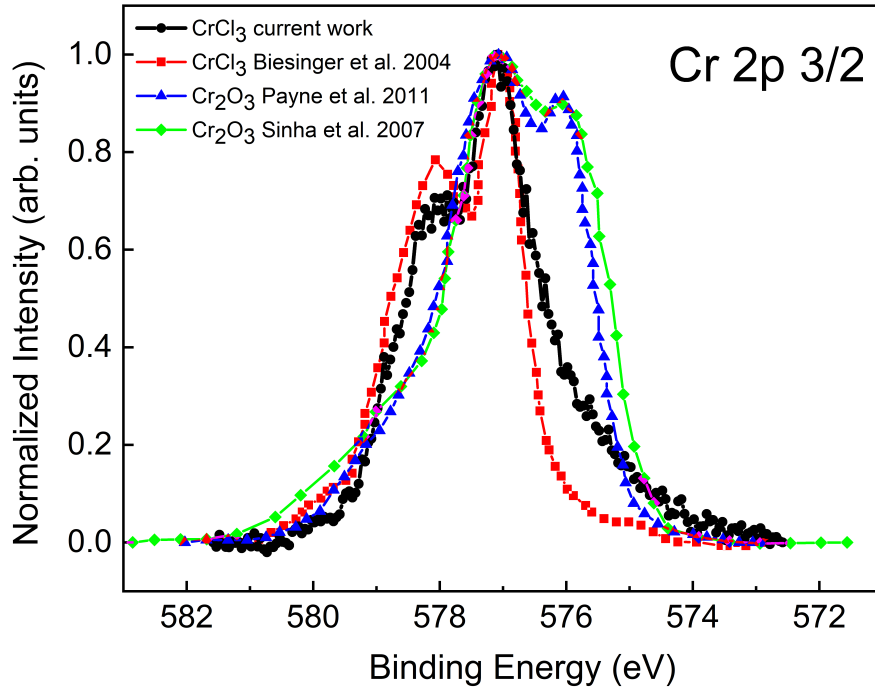

FIG. 1. Comparison with literature of normalized Cr  $2p_{3/2}$  spectrum of this work (acquired after 1 hour 100 °C UHV annealing (black)). Powder phase  $\text{CrCl}_3$  reference spectrum is digitized from Ref. [2] (red).  $\text{Cr}_2\text{O}_3$  reference spectra are digitized from Ref. [3] (blue) and Ref. [4] (blue).

## II. STRUCTURAL PARAMETERS

TABLE I. Optimized structural parameters for pure and oxidized  $\text{CrCl}_3$  monolayers and Cl defective  $\text{CrCl}_3$  supercells.  $\text{Cr}_1$  is a Cr atom with an unperturbed (non defective) first neighboring shell of 6 Cl atoms (labeled as  $\text{Cl}_1$ ), while  $\text{Cr}_2$  atoms are those Cr ones in the structure which are first neighbors of a Cl vacant site (labeled as  $\text{Cl}_2$ ).

|                             | Pure   | Oxidized | (3×3)  | (2×2)  | (2×1)                                                                                            |
|-----------------------------|--------|----------|--------|--------|--------------------------------------------------------------------------------------------------|
| a (Å)                       | 5.89   | 6.13     | 17.97  | 11.98  | 11.98                                                                                            |
| b (Å)                       | 5.89   | 6.13     | 17.99  | 12.02  | 6.04                                                                                             |
| c (Å)                       | 2.68   | 2.75     | 2.81   | 2.83   | 2.81                                                                                             |
| $\alpha$ (°)                | 90.0   | 83.1     | 90.0   | 89.6   | 89.2                                                                                             |
| $\beta$ (°)                 | 90.0   | 98.8     | 90.0   | 90.2   | 90.4                                                                                             |
| $\gamma$ (°)                | 120.0  | 120.0    | 120.0  | 120.1  | 120.3                                                                                            |
| $\text{Cr}_1\text{-Cl}$ (Å) | 2.35x6 | 2.37x6   | 2.36x6 | 2.36x6 | 2.36x3<br>2.36x2<br>2.37x1                                                                       |
| $\text{Cr}_2\text{-Cl}$ (Å) | -      | -        | 2.36x2 | 2.36x2 | 2.36x2<br>2.33x1<br>2.33x1<br>2.33x1<br>2.34x1<br>2.34x1<br>2.34x1<br>2.34x1<br>2.34x1<br>2.35x1 |

## III. ELECTRONIC STRUCTURES AND DENSITY OF STATES

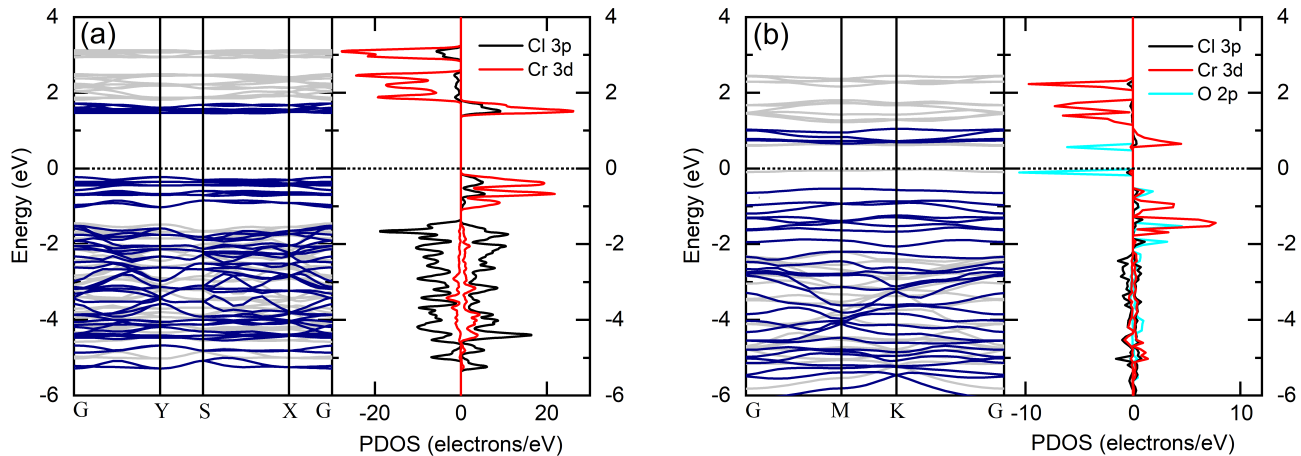

FIG. 2. DFT GGA spin-resolved electronic band structures (left panel: light gray for spin-down and dark blue for spin-up) and projected density of states (right panel: left for spin-down and right for spin-up) of the pure monolayer  $\text{CrCl}_3$  (a) and O- $\text{CrCl}_3$  structure (b).

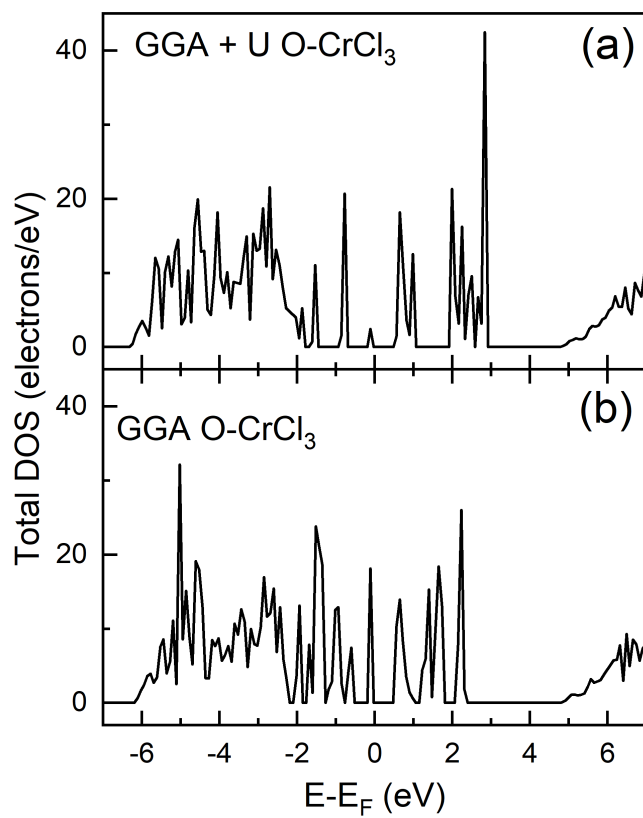

FIG. 3. Total density of states for O-CrCl<sub>3</sub> structures calculated with GGA + U (a) and GGA (b) approaches.

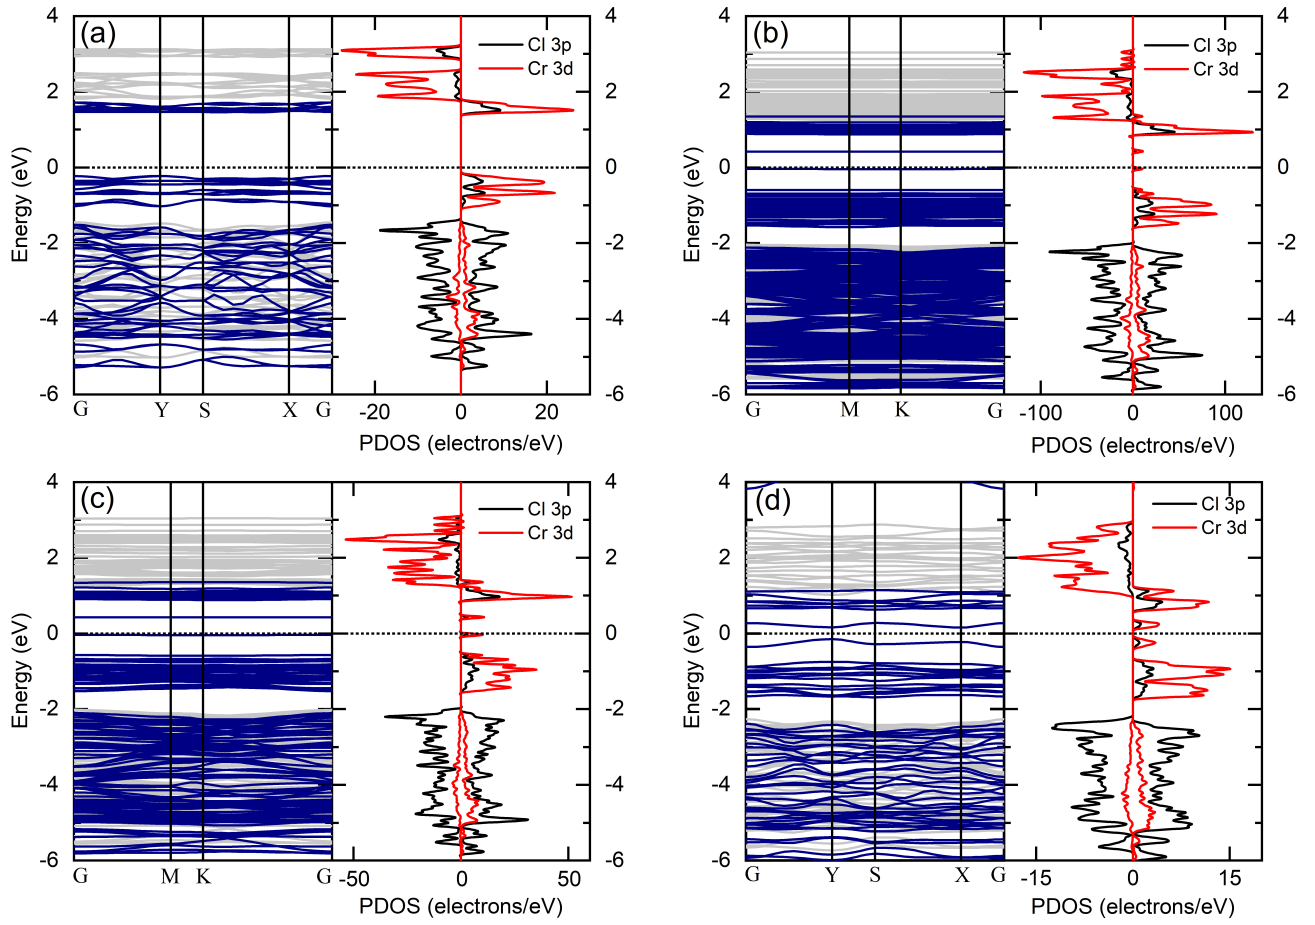

FIG. 4. DFT GGA spin-resolved electronic band structure (left panel: light gray for spin-down and dark blue for spin-up) and projected density of states (right panel: left for spin-down and right for spin-up) of pure monolayer  $\text{CrCl}_3$  (a) and Cl defective monolayer  $\text{CrCl}_3$  with increasing Cl vacancy concentrations of 1.85 % (b), 4.16 % (c), and 8.33 % (d).

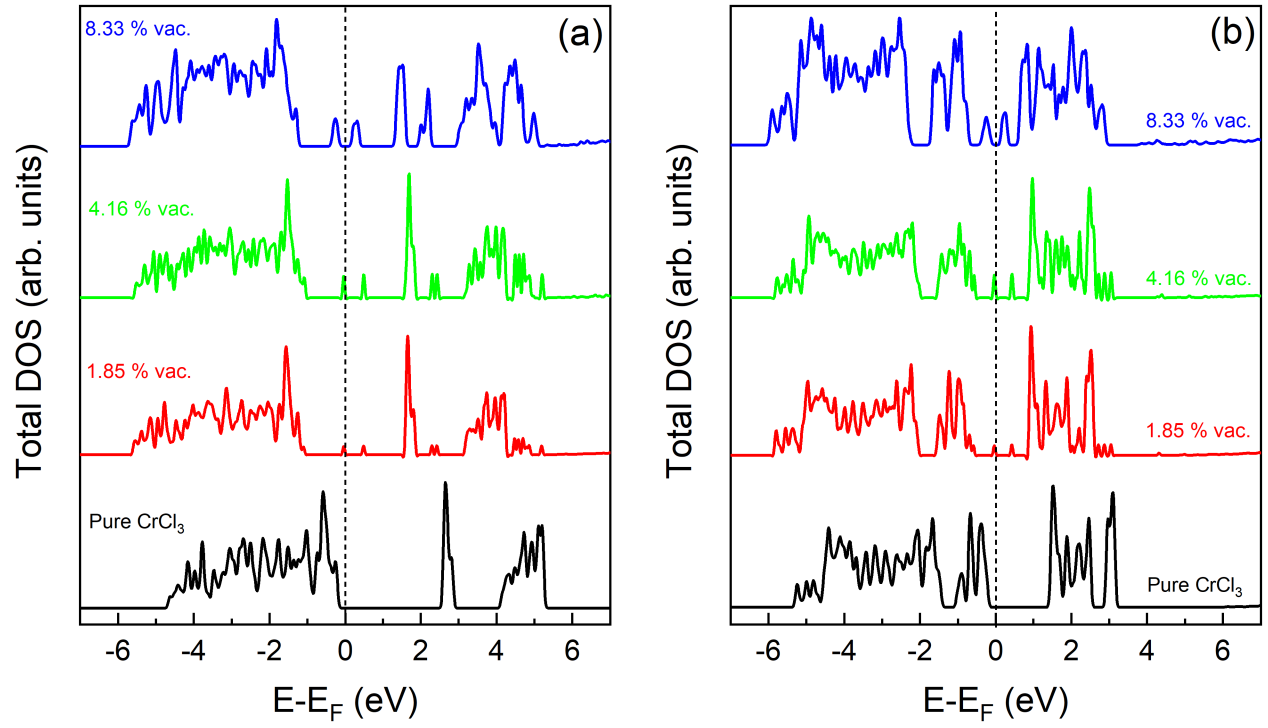

FIG. 5. Total density of states, calculated with GGA + U (a) and GGA (b) methods, for pure monolayer  $\text{CrCl}_3$  (black) and Cl defective monolayer  $\text{CrCl}_3$  structures:  $(3 \times 3)$  1.85 % Cl vacancy (red),  $(2 \times 2)$  4.16 % Cl vacancy (green), and  $(2 \times 1)$  8.33 % Cl vacancy (blue).

- 
- [1] J. F. Moulder, W. F. Stickle, P. E. Sobol, and K.D. Bomben, *Handbook of X-ray Photoelectron Spectroscopy: A Reference Book of Standard Spectra for Identification and Interpretation of XPS Data* (Physical Electronics Division, Perkin-Elmer Corporation, 1992).
  - [2] MC Biesinger, C Brown, JR Mycroft, RD Davidson, and NS McIntyre, "X-ray photoelectron spectroscopy studies of chromium compounds," *Surface and Interface Analysis* **36**, 1550–1563 (2004).
  - [3] BP Payne, MC Biesinger, and NS McIntyre, "X-ray photoelectron spectroscopy studies of reactions on chromium metal and chromium oxide surfaces," *Journal of Electron Spectroscopy and Related Phenomena* **184**, 29–37 (2011).
  - [4] Anil K Sinha and Kenichirou Suzuki, "Novel mesoporous chromium oxide for vocs elimination," *Applied Catalysis B: Environmental* **70**, 417–422 (2007).
